# Supplementary material for: Algorithm-based Management of Infantile Hemangiomas: Reducing Sequelae and Surgical Interventions
Source: PubMed Central journal article supplement — Plast Reconstr Surg Glob Open. 2024 Sep 19;12(9):e6192. doi: 10.1097/GOX.0000000000006192 (PMC11412708; doi:10.1097/gox.0000000000006192), 2024-09-19
Supplement: gox-12-e6192-s001.pdf [file gox-12-e6192-s001.pdf]

| Location                               |             |
|----------------------------------------|-------------|
| Face                                   | 3           |
| Head<br>(hair-bearing area)            | 2           |
| Exposed area<br>(except for head area) | 1           |
| Un-exposed area                        | 0           |
| Size (horizontal)                      |             |
| TBSA 1%>                               | 3           |
| TBSA 0.5-1%                            | 2           |
| TBSA <0.5% ( $1\text{cm}^2$ <)         | 1           |
| TBSA <0.5% ( $<1\text{cm}^2$ )         | 0           |
| Type                                   |             |
| Mixed                                  | 3           |
| Deep                                   | 1           |
| Superficial                            | 0           |
| Ledge effect (if mixed type)           |             |
| Yes                                    | 1           |
| No                                     | 0           |
| Total                                  | <b>0-10</b> |
| High risk                              | 6-10        |
| Moderate risk                          | 3-5         |
| Low risk                               | 0-2         |

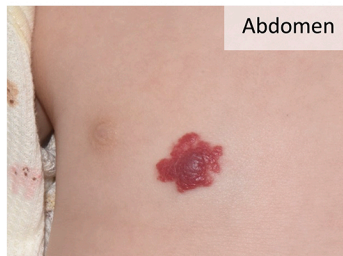

Abdomen

Location 0 point  
 Size 2 point  
 Type 0 point  
 (Ledge effect 0 point)

2 point  
 ↓  
**Low risk**

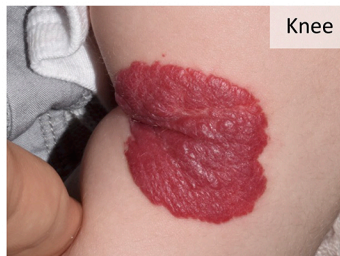

Knee

Location 1 point  
 Size 2 point  
 Type 0 point  
 (Ledge effect 0 point)

3 point  
 ↓  
**Moderate risk**

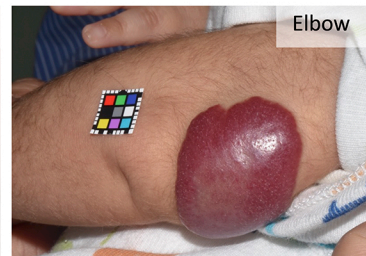

Elbow

Location 1 point  
 Size 3 point  
 Type 3 point  
 (Ledge effect 1 point)

8 point  
 ↓  
**High risk**
