# Supplementary material for: Algorithm-based Management of Infantile Hemangiomas: Reducing Sequelae and Surgical Interventions
Source: PubMed Central journal article supplement — Plast Reconstr Surg Glob Open. 2024 Sep 19;12(9):e6192. doi: 10.1097/GOX.0000000000006192 (PMC11412708; doi:10.1097/gox.0000000000006192), 2024-09-19
Supplement: gox-12-e6192-s002.pdf [file gox-12-e6192-s002.pdf]

## Supplemental digital content 2. Treatment outcomes

(a) Algorithm-compliant patients

| Risk level | Selected treatment   | n (%)    | Sequelae |         | Outcome of IHs without sequelae            |                                      |                                          |
|------------|----------------------|----------|----------|---------|--------------------------------------------|--------------------------------------|------------------------------------------|
|            |                      |          | -        | +       | Mean treatment duration (months, $\pm$ SD) | Number of PDL sessions (n, $\pm$ SD) | Age at resolution (months old, $\pm$ SD) |
| Low        | No treatment         | 17 (13%) | -        | -       | -                                          | -                                    | -                                        |
|            | PDL                  | 38 (30%) | 36 (95%) | 2 (5%)  | 16.5 $\pm$ 8.6                             | 5.7 $\pm$ 2.9                        | 21.8 $\pm$ 9.9                           |
| Moderate   | PDL                  | 53 (42%) | 51 (96%) | 2 (4%)  | 17.8 $\pm$ 9.9                             | 6.2 $\pm$ 3.3                        | 20.0 $\pm$ 9.0                           |
| High       | Oral PPL with PDL    | 15 (12%) | 14 (93%) | 1 (7%)  | 20.0 $\pm$ 9.0                             | 5.1 $\pm$ 2.5                        | 22.3 $\pm$ 9.0                           |
|            | Oral PPL without PDL | 3 (2%)   | 2 (67%)  | 1 (33%) | 9.8 $\pm$ 2.9                              | -                                    | 13.8 $\pm$ 4.1                           |

(b) Non-algorithm-compliant patients

| Risk level | Selected treatment   | n (%)      | Sequelae   |             | Outcome of IHs                                               |                                    |                                        |
|------------|----------------------|------------|------------|-------------|--------------------------------------------------------------|------------------------------------|----------------------------------------|
|            |                      |            | -          | +           | without sequelae<br>Mean treatment duration<br>(months, ±SD) | Number of PDL sessions<br>(n, ±SD) | Age at resolution<br>(months old, ±SD) |
| Low        | -                    | 0<br>(0%)  | -          | -           | -                                                            | -                                  | -                                      |
| Moderate   | No treatment         | 7<br>(39%) | -          | -           | -                                                            | -                                  | -                                      |
|            | Oral PPL with PDL    | 1<br>(6%)  | 0<br>(0%)  | 2<br>(100%) | -                                                            | -                                  | -                                      |
|            | Oral PPL without PDL | 2<br>(11%) | 0<br>(0%)  | 1<br>(100%) | -                                                            | -                                  | -                                      |
| High       | PDL                  | 8<br>(44%) | 5<br>(62%) | 3<br>(38%)  | 25.4±12.5                                                    | 7.2±2.2                            | 29.0±14.7                              |

SD, Standard deviation; IH, infantile hemangiomas; PPL, propranolol; PDL, pulsed dye laser
