# Supplementary material for: Algorithm-based Management of Infantile Hemangiomas: Reducing Sequelae and Surgical Interventions
Source: PubMed Central journal article supplement — Plast Reconstr Surg Glob Open. 2024 Sep 19;12(9):e6192. doi: 10.1097/GOX.0000000000006192 (PMC11412708; doi:10.1097/gox.0000000000006192), 2024-09-19
Supplement: gox-12-e6192-s003.pdf [file gox-12-e6192-s003.pdf]

Supplemental digital content 3. Analysis of 3 cases: Middle aesthetic risk, treated with oral propranolol, yet developed sequelae (non-algorithm compliant).

|   | Sex | Location | Size (cm) | Type  | Ledge effect | Aesthetic risk score | Aesthetic risk level | Age at PPL initiation | PPL administration period |
|---|-----|----------|-----------|-------|--------------|----------------------|----------------------|-----------------------|---------------------------|
| 1 | F   | Forehead | 1         | Deep  | -            | 4                    | Middle               | 18                    | 6                         |
| 2 | F   | Back     | 3         | Mixed | -            | 4                    | Middle               | 7                     | 6                         |
| 3 | F   | Chest    | 2         | Mixed | +            | 5                    | Middle               | 6                     | 6                         |
